# Supplementary material
Source: Elsevier journal article supplement (https://authors.library.caltech.edu/56503/12/mmc11.zip)
Supplement: mmc11 [file mmc11.zip]

Archive with 1 entries (1 files):
- T449_Mints_Velocity.grd
